# Supplementary material for: Reactive triblock polymers from tandem ring-opening polymerization for nanostructured vinyl thermosets
Source: Royal Society of Chemistry journal article supplement (doi:10.1039/c1py00450f), 2011-11-14
Supplement: c1py00450f.pdf [file c1py00450f.pdf]

## Supporting Information

### Reactive triblock polymers from tandem ring-opening polymerizations for nanostructured vinyl thermosets

Mark A. Amendt, Louis M. Pitet, Sarah Moench and Marc A. Hillmyer\*

Department of Chemistry, University of Minnesota, Minneapolis, Minnesota 55455

\*To whom correspondence should be addressed: hillmyer@umn.edu

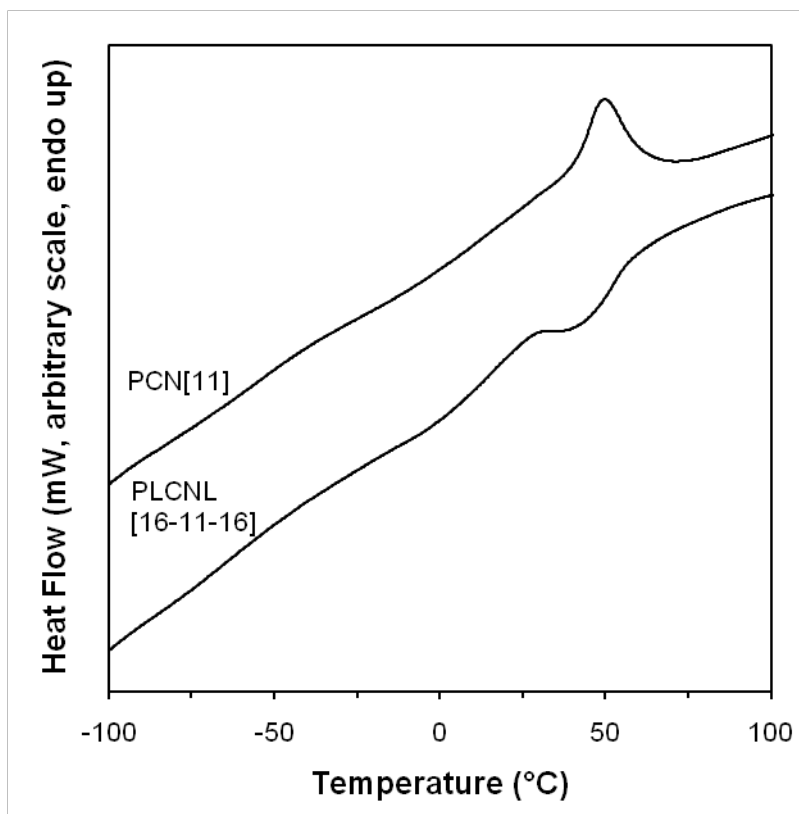

**Figure S1:** DSC traces of PCN[11] copolymer and PLCNL[16-11-16] block polymer. Traces represent the second heating at a rate of 10 °C/min after annealing at 120 °C for 5 min before cooling to -120 °C. The traces have been vertically shifted for clarity.

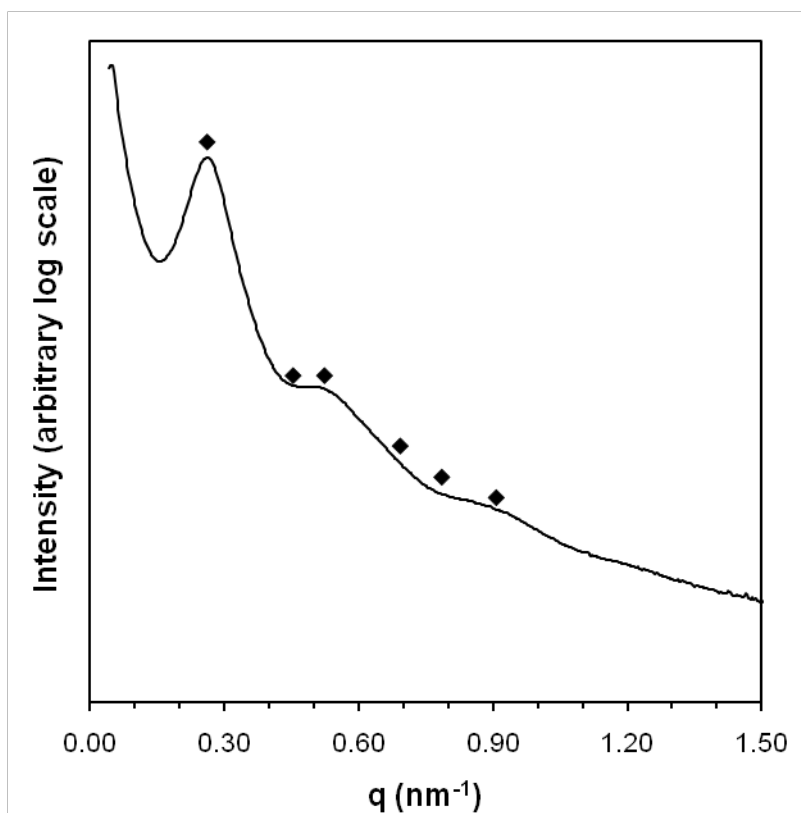

**Figure S2.** One dimensional SAXS profile of PLCNL[16-11-16] block polymer measured at 25 °C. The black diamonds indicate the predicted positions of higher order reflections for a hexagonally packed cylindrical morphology based on the position of the principal scattering peak.

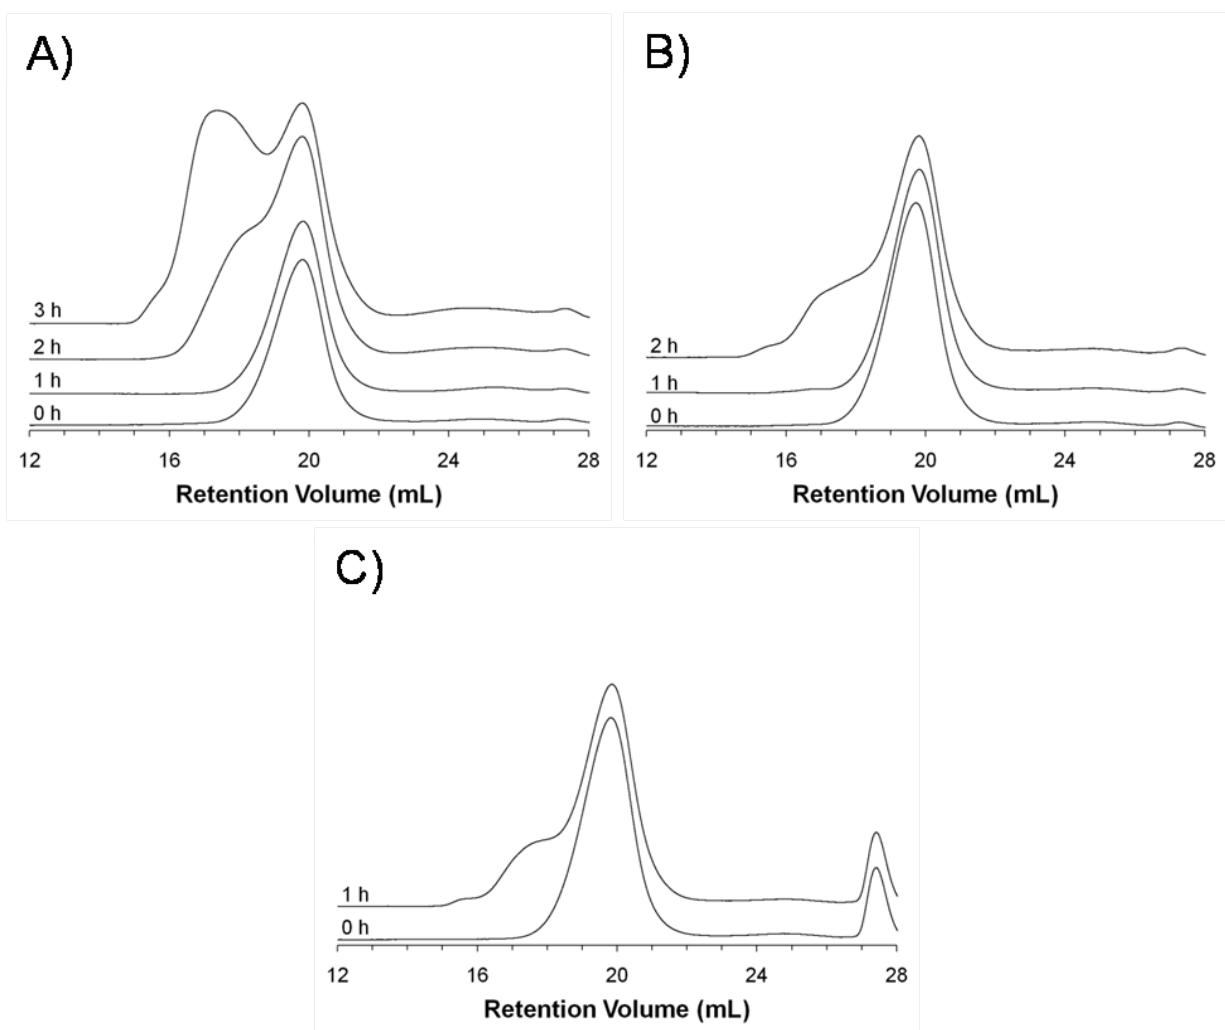

**Figure S3:** SEC as a function of time for samples of A) SD 34, B) M 34 and C) ME 34 films.

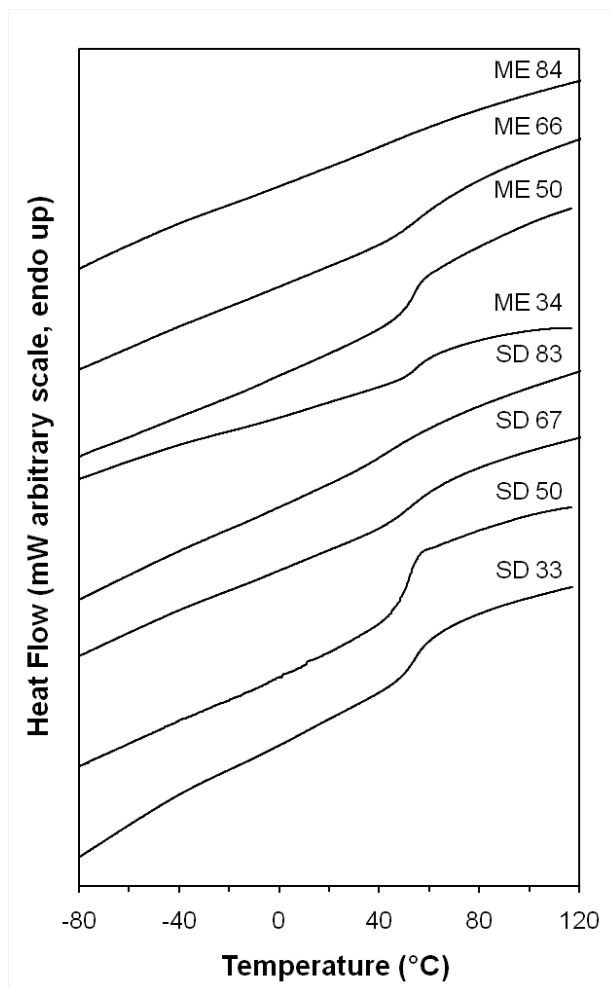

**Figure S4.** DSC traces for crosslinked films with difunctional monomers. Traces represent the second heating at a rate of 10 °C/min after annealing at 120 °C for 5 min before cooling to -120 °C. The traces have been vertically shifted for clarity.

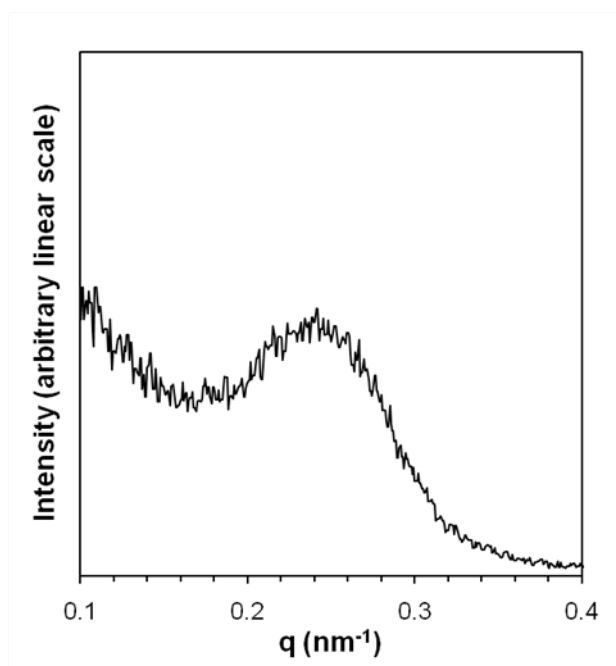

**Figure S5:** One dimensional SAXS profile of film PLCNL 100 measured at 25 °C.
